# Supplementary material for: One-dimensional coordination polymers constructed from binuclear 3d–4f nodes and isonicotinato spacer
Source: Royal Society of Chemistry journal article supplement (doi:10.1039/c6ce00729e), 2016-01-01
Supplement: c6ce00729e1.pdf [file c6ce00729e1.pdf]

# One-dimensional coordination polymers constructed from binuclear 3d-4f nodes and isonicotinato spacer.

Andrei A. Patrascu,<sup>a,b</sup> Sergiu Calancea,<sup>a</sup> Rafael A. Allão Cassaro,<sup>c</sup> Stéphane Soriano,<sup>d,e</sup> Augustin M. Madalan,<sup>b</sup> Catalin Maxim,<sup>b</sup> Miguel A. Novak,<sup>f</sup> Maria G. F. Vaz,<sup>\*a</sup> Marius Andruh<sup>\*b</sup>

<sup>a</sup>*Universidade Federal Fluminense, Instituto de Química, Niterói, Rio de Janeiro, Brazil*

<sup>b</sup>*Inorganic Chemistry Laboratory, Faculty of Chemistry, University of Bucharest, Str. Dumbrava Rosie nr. 23, 020464-Bucharest, Romania*

<sup>c</sup>*Instituto de Química, Universidade Federal do Rio de Janeiro, Rio de Janeiro, Brazil*

<sup>d</sup>*Universidade Federal Fluminense, Instituto de Física, Niterói, Rio de Janeiro, Brazil*

<sup>e</sup>*Consiglio Nazionale delle Ricerche – Istituto di Chimica dei Composti Organo-Metallici, via Madonna del Piano 10, 50019, Sesto Fiorentino, Firenze, Italy*

<sup>f</sup>*Instituto de Física Universidade Federal do Rio de Janeiro, Rio de Janeiro, Brazil*

**Table S1** Selected bond angles (°) for **1 – 3**

| <b>1</b>                    | <b>2</b>                   | <b>3</b>                   |
|-----------------------------|----------------------------|----------------------------|
| O1 - Gd1 - O2 = 68.38(14)   | O1 - Gd1 - O2 = 68.71(7)   | O1 - Dyl - O2 = 69.08(7)   |
| O1 - Gd1 - O3 = 61.81(13)   | O1 - Gd1 - O3 = 60.49(6)   | O1 - Dyl - O3 = 60.78(7)   |
| O1 - Gd1 - O4 = 114.64(13)  | O1 - Gd1 - O4 = 114.86(6)  | O1 - Dyl - O4 = 115.32(7)  |
| O1 - Gd1 - O5 = 74.07(13)   | O1 - Gd1 - O5 = 82.45(6)   | O1 - Dyl - O5 = 81.73(7)   |
| O1 - Gd1 - O6 = 138.28(14)  | O1 - Gd1 - O6 = 139.67(7)  | O1 - Dyl - O6 = 139.47(8)  |
| O1 - Gd1 - O7 = 119.71(14)  | O1 - Gd1 - O7 = 105.70(7)  | O1 - Dyl - O7 = 105.50(8)  |
| O1 - Gd1 - O8 = 141.23(13)  | O1 - Gd1 - O8 = 145.17(7)  | O1 - Dyl - O8 = 145.93(8)  |
| O1 - Gd1 - O10 = 72.51(14)  | O1 - Gd1 - O10 = 74.91(7)  | O1 - Dyl - O10 = 75.56(7)  |
| O2 - Gd1 - O3 = 130.14(14)  | O2 - Gd1 - O3 = 126.96(6)  | O2 - Dyl - O3 = 127.46(7)  |
| O2 - Gd1 - O4 = 60.83(13)   | O2 - Gd1 - O4 = 60.57(7)   | O2 - Dyl - O4 = 60.73(7)   |
| O2 - Gd1 - O5 = 98.94(13)   | O2 - Gd1 - O5 = 96.12(6)   | O2 - Dyl - O5 = 95.30(7)   |
| O2 - Gd1 - O6 = 133.27(14)  | O2 - Gd1 - O6 = 138.70(8)  | O2 - Dyl - O6 = 138.24(8)  |
| O2 - Gd1 - O7 = 146.53(14)  | O2 - Gd1 - O7 = 144.69(7)  | O2 - Dyl - O7 = 145.32(7)  |
| O2 - Gd1 - O8 = 83.29(14)   | O2 - Gd1 - O8 = 90.94(7)   | O2 - Dyl - O8 = 90.73(8)   |
| O2 - Gd1 - O10 = 82.10(14)  | O2 - Gd1 - O10 = 76.20(7)  | O2 - Dyl - O10 = 76.66(7)  |
| O3 - Gd1 - O4 = 145.56(13)  | O3 - Gd1 - O4 = 130.27(6)  | O3 - Dyl - O4 = 129.83(7)  |
| O3 - Gd1 - O5 = 70.07(14)   | O3 - Gd1 - O5 = 64.19(7)   | O3 - Dyl - O5 = 64.01(7)   |
| O3 - Gd1 - O6 = 88.92(14)   | O3 - Gd1 - O6 = 81.62(7)   | O3 - Dyl - O6 = 81.16(8)   |
| O3 - Gd1 - O7 = 66.37(14)   | O3 - Gd1 - O7 = 68.00(7)   | O3 - Dyl - O7 = 67.51(7)   |
| O3 - Gd1 - O8 = 137.37(14)  | O3 - Gd1 - O8 = 140.57(7)  | O3 - Dyl - O8 = 140.66(8)  |
| O3 - Gd1 - O10 = 81.40(15)  | O3 - Gd1 - O10 = 103.14(7) | O3 - Dyl - O10 = 103.83(8) |
| O4 - Gd1 - O5 = 76.06(14)   | O4 - Gd1 - O5 = 66.12(7)   | O4 - Dyl - O5 = 65.97(7)   |
| O4 - Gd1 - O6 = 72.44(13)   | O4 - Gd1 - O6 = 78.27(7)   | O4 - Dyl - O6 = 77.63(8)   |
| O4 - Gd1 - O7 = 125.48(14)  | O4 - Gd1 - O7 = 139.29(7)  | O4 - Dyl - O7 = 138.95(7)  |
| O4 - Gd1 - O8 = 69.02(14)   | O4 - Gd1 - O8 = 74.38(7)   | O4 - Dyl - O8 = 73.41(8)   |
| O4 - Gd1 - O10 = 132.07(14) | O4 - Gd1 - O10 = 124.24(7) | O4 - Dyl - O10 = 124.37(8) |
| O5 - Gd1 - O6 = 67.94(14)   | O5 - Gd1 - O6 = 68.00(7)   | O5 - Dyl - O6 = 68.60(7)   |
| O5 - Gd1 - O7 = 114.53(14)  | O5 - Gd1 - O7 = 118.18(7)  | O5 - Dyl - O7 = 118.31(7)  |
| O5 - Gd1 - O8 = 138.51(14)  | O5 - Gd1 - O8 = 129.17(7)  | O5 - Dyl - O8 = 128.79(8)  |
| O5 - Gd1 - O10 = 143.48(15) | O5 - Gd1 - O10 = 157.35(7) | O5 - Dyl - O10 = 157.28(8) |
| O6 - Gd1 - O7 = 64.92(14)   | O6 - Gd1 - O7 = 68.41(7)   | O6 - Dyl - O7 = 68.39(8)   |
| O6 - Gd1 - O8 = 80.47(14)   | O6 - Gd1 - O8 = 73.85(8)   | O6 - Dyl - O8 = 73.45(9)   |
| O6 - Gd1 - O10 = 135.37(14) | O6 - Gd1 - O10 = 131.14(7) | O6 - Dyl - O10 = 130.86(8) |
| O7 - Gd1 - O8 = 71.77(15)   | O7 - Gd1 - O8 = 74.39(7)   | O7 - Dyl - O8 = 75.32(8)   |
| O7 - Gd1 - O10 = 71.33(14)  | O7 - Gd1 - O10 = 68.86(7)  | O7 - Dyl - O10 = 68.97(8)  |
| O8 - Gd1 - O10 = 78.00(15)  | O8 - Gd1 - O10 = 72.85(8)  | O8 - Dyl - O10 = 73.15(9)  |
| O1 - Gd1 - Co1 = 35.31(9)   | O1 - Gd1 - Ni1 = 34.48(4)  | O1 - Dyl - Ni1 = 34.74(5)  |
| O2 - Gd1 - Co1 = 34.39(10)  | O2 - Gd1 - Ni1 = 35.33(5)  | O2 - Dyl - Ni1 = 35.52(5)  |
| O3 - Gd1 - Co1 = 96.14(10)  | O3 - Gd1 - Ni1 = 94.90(4)  | O3 - Dyl - Ni1 = 95.45(5)  |
| O4 - Gd1 - Co1 = 91.47(9)   | O4 - Gd1 - Ni1 = 91.77(5)  | O4 - Dyl - Ni1 = 92.24(5)  |
| O5 - Gd1 - Co1 = 92.72(9)   | O5 - Gd1 - Ni1 = 95.48(4)  | O5 - Dyl - Ni1 = 94.84(5)  |
| O6 - Gd1 - Co1 = 157.04(10) | O6 - Gd1 - Ni1 = 163.04(5) | O6 - Dyl - Ni1 = 162.96(6) |
| O7 - Gd1 - Co1 = 137.34(10) | O7 - Gd1 - Ni1 = 125.73(5) | O7 - Dyl - Ni1 = 125.83(6) |
| O8 - Gd1 - Co1 = 109.53(10) | O8 - Gd1 - Ni1 = 116.97(6) | O8 - Dyl - Ni1 = 117.10(7) |
| O10 - Gd1 - Co1 = 67.59(10) | O10 - Gd1 - Ni1 = 65.82(5) | O10 - Dyl - Ni1 = 66.18(5) |
| O1 - Co1 - O2 = 81.91(16)   | O1 - Ni1 - O2 = 81.08(8)   | O1 - Ni1 - O2 = 80.42(8)   |
| O1 - Co1 - N1 = 91.34(19)   | O1 - Ni1 - N1 = 91.41(9)   | O1 - Ni1 - N1 = 91.60(9)   |
| O2 - Co1 - N1 = 172.79(19)  | O2 - Ni1 - N1 = 172.42(9)  | O2 - Ni1 - N1 = 171.92(9)  |
| O1 - Co1 - N2 = 171.41(19)  | O1 - Ni1 - N2 = 170.89(9)  | O1 - Ni1 - N2 = 170.54(10) |
| O2 - Co1 - N2 = 90.86(19)   | O2 - Ni1 - N2 = 90.14(9)   | O2 - Ni1 - N2 = 90.50(10)  |
| N1 - Co1 - N2 = 95.7(2)     | N1 - Ni1 - N2 = 97.31(10)  | N1 - Ni1 - N2 = 97.42(11)  |
| O1 - Co1 - O9 = 87.15(15)   | O1 - Ni1 - O9 = 91.70(7)   | O1 - Ni1 - O9 = 91.63(8)   |
| O2 - Co1 - O9 = 91.92(15)   | O2 - Ni1 - O9 = 90.71(8)   | O2 - Ni1 - O9 = 90.80(8)   |

N1 - Co1 - O9 = 85.20(18)  
N2 - Co1 - O9 = 88.48(17)  
O1 - Co1 - N3#1 = 95.96(16)  
O2 - Co1 - N3#1 = 85.69(16)  
N1 - Co1 - N3#1 = 97.57(19)  
N2 - Co1 - N3#1 = 88.07(18)  
O9 - Co1 - N3#1 = 175.78(17)  
O1 - Co1 - Gd1 = 43.84(11)  
O2 - Co1 - Gd1 = 39.76(11)  
N1 - Co1 - Gd1 = 133.07(15)  
N2 - Co1 - Gd1 = 128.00(15)  
O9 - Co1 - Gd1 = 80.32(11)  
N3<sup>1</sup> - Co1 - Gd1 = 99.93(12)  
Co1 - O1 - Gd1 = 100.85(16)  
Co1 - O2 - Gd1 = 105.85(17)  
l = x+1, y, z

N1 - Ni1 - O9 = 88.44(8)  
N2 - Ni1 - O9 = 85.94(8)  
O1 - Ni1 - N3#1 = 92.70(8)  
O2 - Ni1 - N3#1 = 91.11(8)  
N1 - Ni1 - N3#1 = 90.30(9)  
N2 - Ni1 - N3#1 = 89.89(9)  
O9 - Ni1 - N3#1 = 175.46(8)  
O1 - Ni1 - Gd1 = 41.17(5)  
O2 - Ni1 - Gd1 = 41.29(5)  
N1 - Ni1 - Gd1 = 131.15(7)  
N2 - Ni1 - Gd1 = 129.73(7)  
O9 - Ni1 - Gd1 = 83.33(5)  
N3<sup>1</sup> - Ni1 - Gd1 = 100.76(6)  
Ni1 - O1 - Gd1 = 104.35(8)  
Ni1 - O2 - Gd1 = 103.38(8)  
l = x-1/2, y, -z+1/2

N1 - Ni1 - O9 = 88.18(9)  
N2 - Ni1 - O9 = 85.81(9)  
O1 - Ni1 - N3#1 = 93.03(9)  
O2 - Ni1 - N3#1 = 91.36(9)  
N1 - Ni1 - N3#1 = 90.28(9)  
N2 - Ni1 - N3#1 = 89.81(9)  
O9 - Ni1 - N3#1 = 175.13(9)  
O1 - Ni1 - Dy1 = 40.89(6)  
O2 - Ni1 - Dy1 = 40.99(6)  
N1 - Ni1 - Dy1 = 130.95(7)  
N2 - Ni1 - Dy1 = 129.66(8)  
O9 - Ni1 - Dy1 = 83.15(6)  
N3<sup>1</sup> - Ni1 - Dy1 = 101.32(7)  
Ni1 - O1 - Dy1 = 104.37(9)  
Ni1 - O2 - Dy1 = 103.48(9)  
l = x+1/2, y, -z+3/2

---

**Table S2** Summary of crystal data collection and refinement parameters for [Ni(valpn)Pr(hfac)<sub>2</sub>(IN)]

|                                                                                                            | [Ni(valpn)Pr(hfac) <sub>2</sub> (IN)]                                               |
|------------------------------------------------------------------------------------------------------------|-------------------------------------------------------------------------------------|
| Empirical formula                                                                                          | C <sub>35</sub> H <sub>26</sub> F <sub>12</sub> N <sub>3</sub> NiO <sub>10</sub> Pr |
| <i>M</i> (g mol <sup>-1</sup> )                                                                            | 1076.21                                                                             |
| Temperature, (K)                                                                                           | 293(2)                                                                              |
| Wavelength, (Å)                                                                                            | 0.71073                                                                             |
| Crystal system                                                                                             | <i>Orthorhombic</i>                                                                 |
| Space group                                                                                                | <i>Pbca</i>                                                                         |
| <i>a</i> (Å)                                                                                               | 18.346(4)                                                                           |
| <i>b</i> (Å)                                                                                               | 16.067(3)                                                                           |
| <i>c</i> (Å)                                                                                               | 28.455(6)                                                                           |
| <i>V</i> (Å <sup>3</sup> )                                                                                 | 8387(3)                                                                             |
| <i>Z</i>                                                                                                   | 8                                                                                   |
| <i>D<sub>c</sub></i> (g cm <sup>-3</sup> )                                                                 | 1.705                                                                               |
| $\mu$ (mm <sup>-1</sup> )                                                                                  | 1.706                                                                               |
| F(000)                                                                                                     | 4256                                                                                |
| Goodness-of-fit on <i>F</i> <sup>2</sup>                                                                   | 0.824                                                                               |
| Final <i>R</i> <sub>1</sub> <sup>a</sup> , <i>wR</i> <sub>2</sub> <sup>b</sup> [ <i>I</i> >2σ( <i>I</i> )] | 0.0553, 0.077                                                                       |
| <i>R</i> <sub>1</sub> <sup>a</sup> , <i>wR</i> <sub>2</sub> <sup>b</sup> (all data)                        | 0.1893, 0.1059                                                                      |
| Largest diff. peak and hole (eÅ <sup>-3</sup> )                                                            | -1.107, 0.929                                                                       |

The praseodymium derivative has been obtained following the same procedure presented for compounds **2** and **3**.

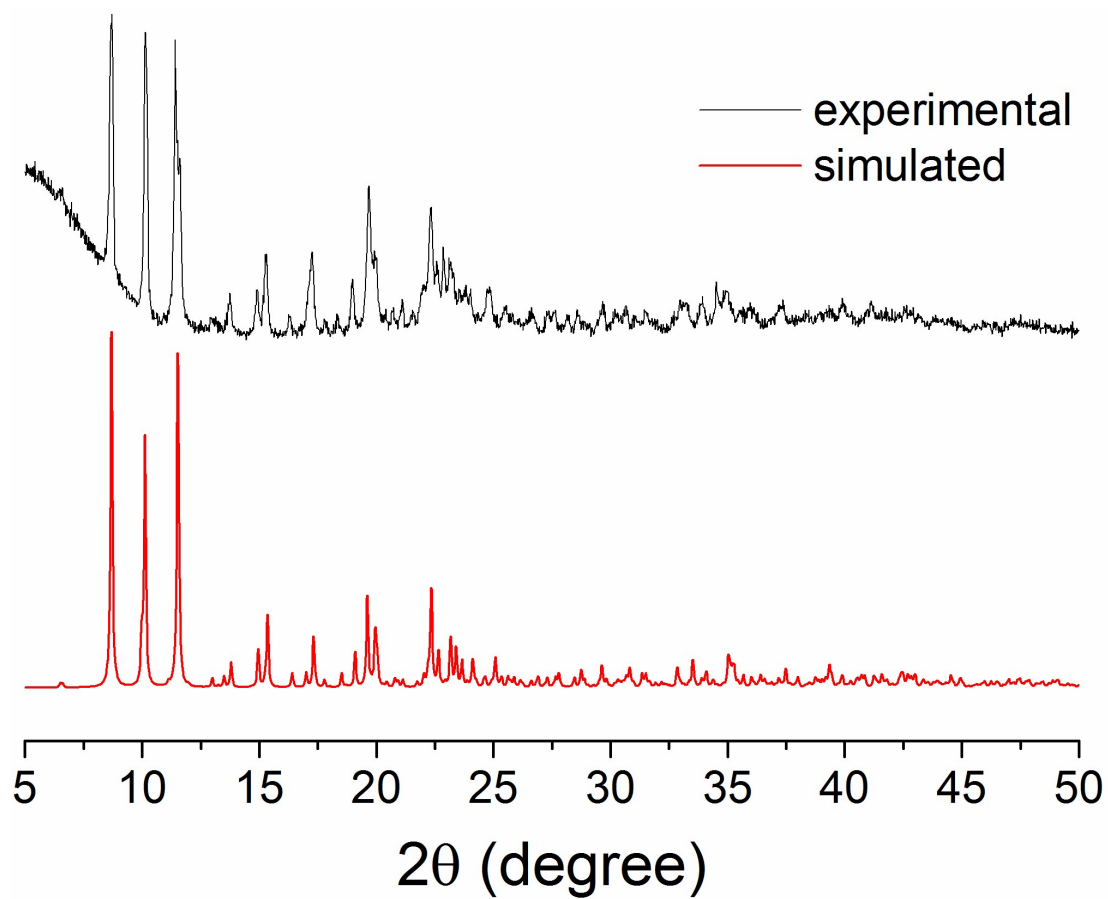

**Figure S1:** Powder X-ray diffraction pattern of compound **1** at room temperature, together with the calculated pattern from the single crystal data.

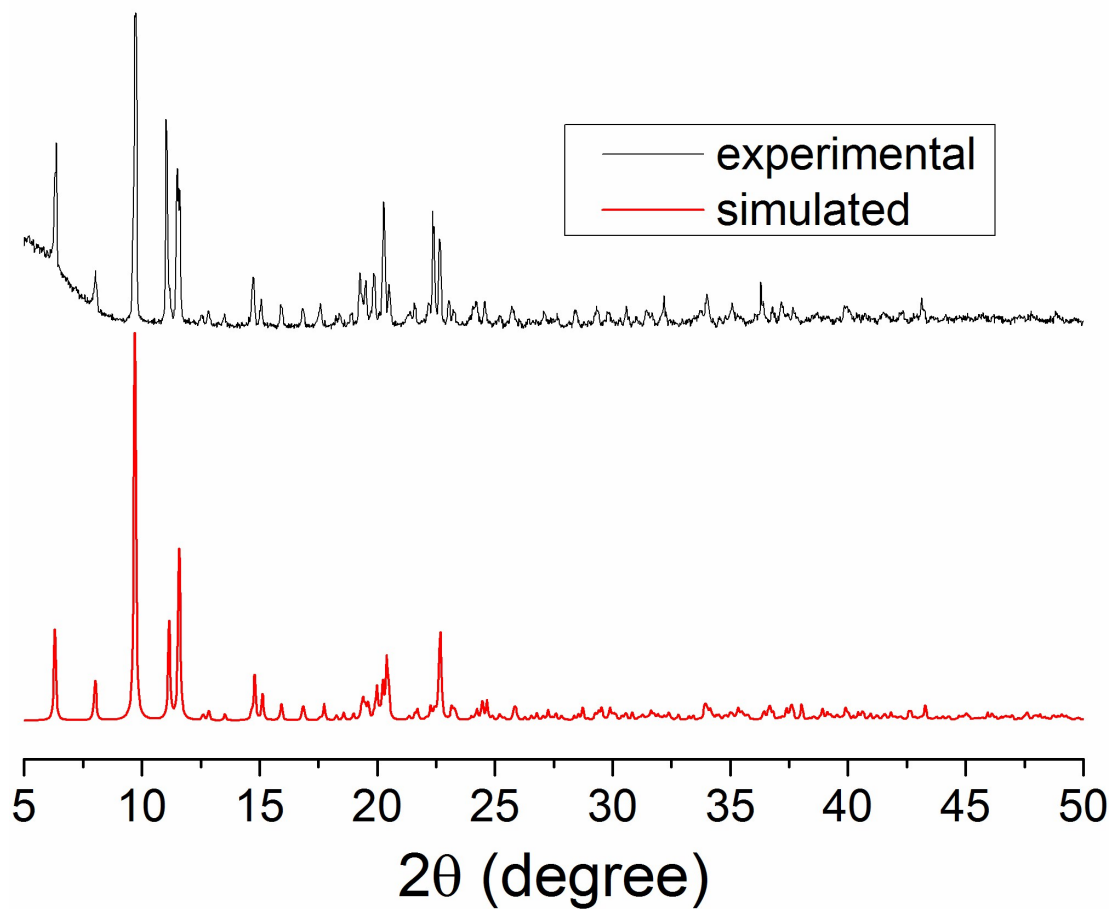

**Figure S2:** Powder X-ray diffraction pattern of compound 2 at room temperature, together with the calculated pattern from the single crystal data.

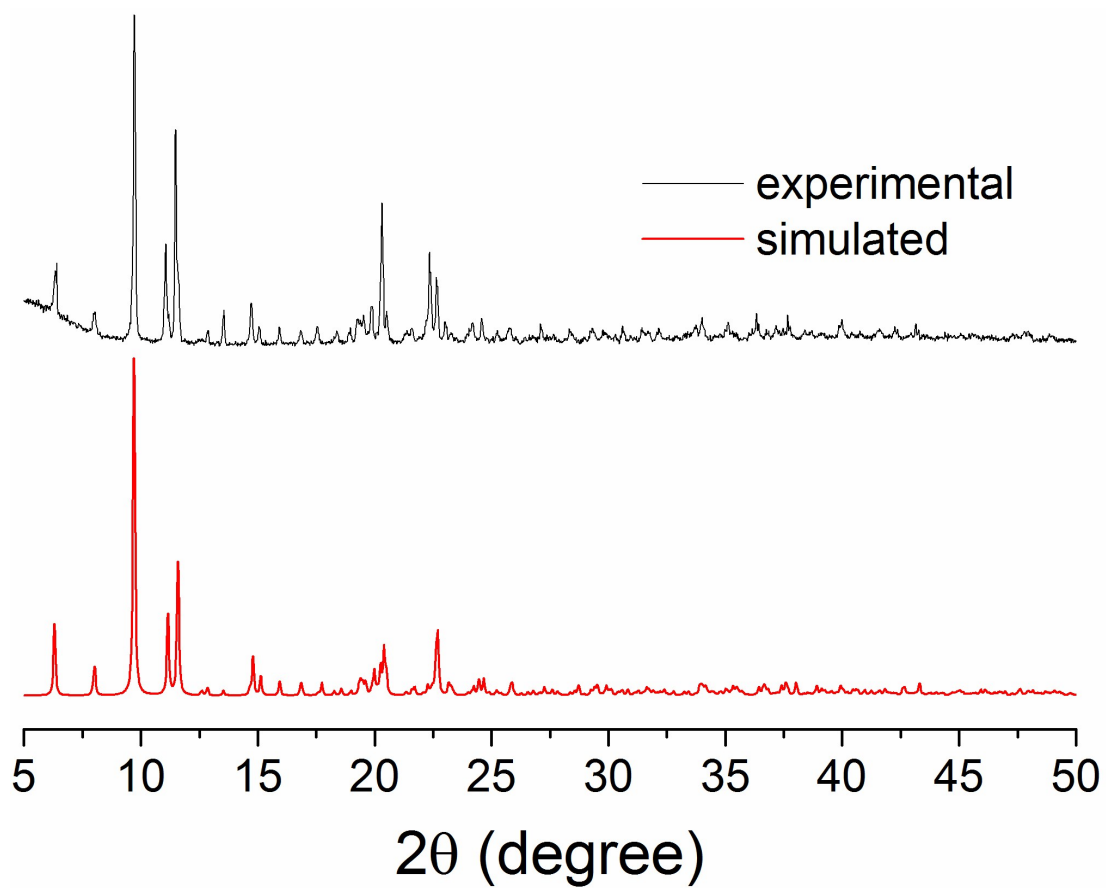

**Figure S3:** Powder X-ray diffraction pattern of compound **3** at room temperature, together with the calculated pattern from the single crystal data.

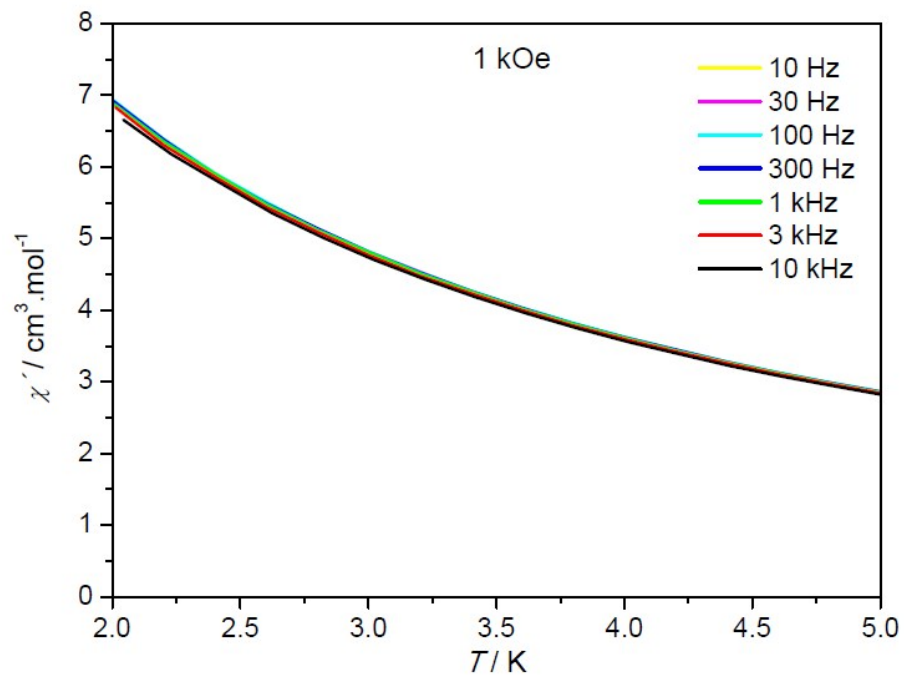

a)

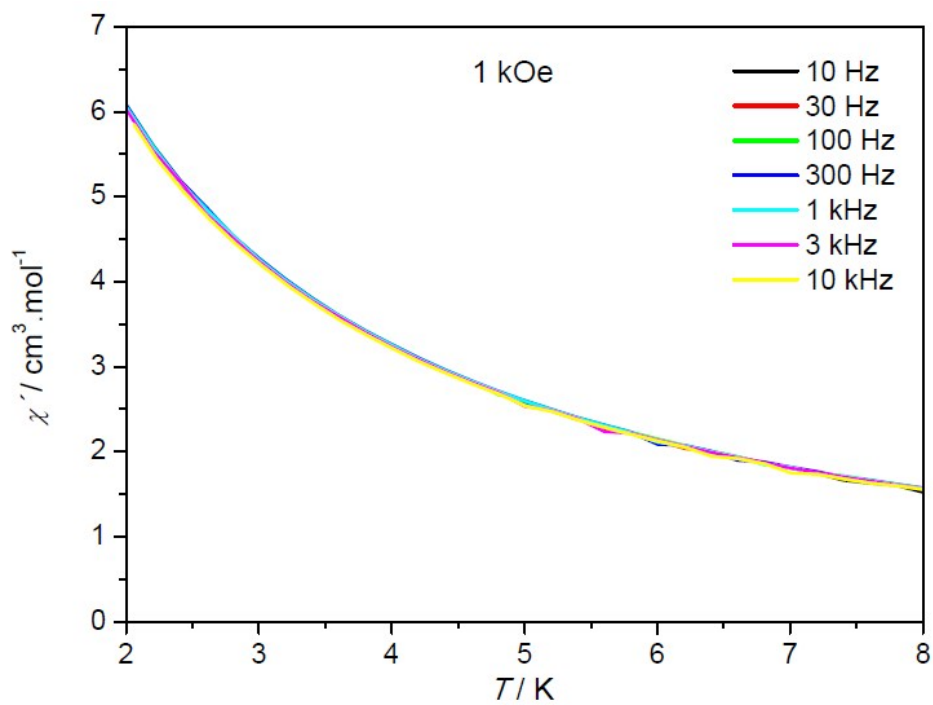

b)

**Figure S4:** Thermal dependence of the in-phase ( $\chi'$ ) ac magnetic susceptibility for **1** (a) and **2** (b) under  $H_{\text{external}} = 1 \text{ kOe}$ , for different oscillating frequencies
